# Supplementary material for: COVID-19 Booster Vaccination in Early Pregnancy and Surveillance for Spontaneous Abortion
Source: PubMed Central journal article supplement (PMC10199343; doi:10.1001/jamanetworkopen.2023.14350), 2023-05-19
Supplement: jamanetwopen-e2314350-s002.pdf [file jamanetwopen-e2314350-s002.pdf]

## Data Sharing Statement

Kharbanda. COVID-19 Booster Vaccination in Early Pregnancy and Surveillance for Spontaneous Abortion. *JAMA Netw Open*. Published May 19, 2023.

doi:10.1001/jamanetworkopen.2023.14350

### Data

**Data available:** Yes

**Data types:** Other (please specify)

**Additional Information:** Data from the Vaccine Safety Datalink can be requested at the URL listed below

### How to access

**data:** <https://www.cdc.gov/vaccinesafety/ensuringsafety/monitoring/vsd/accessing-data.html>

**When available:** With publication

### Supporting Documents

**Document types:** Statistical/analytic code

### How to access

**documents:** <https://www.cdc.gov/vaccinesafety/ensuringsafety/monitoring/vsd/accessing-data.html>

**When available:** With publication

### Additional Information

**Who can access the data:** The VSD data sharing program is administered by the National Center for Health Statistics Research Data Center (NCHS RDC). VSD data created before 2000 are available through the data sharing program for new vaccine safety studies for analyses at the RDC Datasets from published VSD studies from 2002 to the present may be accessed for secondary analyses at the RDC The VSD data sharing program is a three-step process: Submission of proposals to NCHS RDC Submission of proposal to VSD participating sites' Institutional Review Boards (IRBs) Access to VSD data The VSD data available through this data sharing program can only be accessed at the NCHS RDC. Specific details for this program can be found at 'Guidelines for VSD Data Sharing'

**Types of analyses:** For evaluation of vaccine safety

**Mechanisms of data availability:** After approval of a proposal

**Any additional restrictions:** As above
